# Supplementary material for: Mucosal Immune Response to Feline Enteric Coronavirus Infection
Source: PubMed Central journal article supplement (PMC6832150; doi:10.3390/v11100906), 2019-09-27
Supplement: viruses-11-00906-s001.pdf [file viruses-11-00906-s001.pdf]

**Table S1. Serum Chemistry and Hematology Results.**

| TEST                          | UNITS                | REFERENCE | GROUP 1 | GROUP 2 | GROUP 3 |
|-------------------------------|----------------------|-----------|---------|---------|---------|
|                               |                      | INTERVAL  |         |         |         |
| <b>CHEMISTRY</b>              |                      |           |         |         |         |
| Glucose                       | mg/dl                | 68-140    | 74.9    | 79.3    | 89.7    |
| BUN                           | mg/dl                | 18-35     | 22.9    | 24.7    | 25.1    |
| Creat                         | mg/dl                | 0.8-2.4   | 1.4     | 1.4     | 1.5     |
| Ca                            | mg/dl                | 9.2-11.1  | 9.8     | 9.6     | 9.6     |
| Phos                          | mg/dl                | 3.0-6.0   | 4.9     | 4.9     | 4.8     |
| Mg <sup>++</sup>              | mg/dl                | 2.0-2.7   | 2.6     | 2.6     | 2.5     |
| T.Protein                     | G/dl                 | 6.3-8.0   | 6.6     | 6.5     | 6.4     |
| Alb                           | G/dl                 | 3.1-4.4   | 3.9     | 3.7     | 3.7     |
| Glob                          | G/dl                 | 2.7-4.2   | 2.7     | 2.8     | 2.7     |
| A/G                           | G/dl                 | 0.8-1.6   | 1.5     | 1.3     | 1.4     |
| Chol                          | mg/dl                | 95-270    | 174.3   | 172.3   | 173.1   |
| T.Bili                        | mg/dl                | 0-0.1     | 0.1     | 0.1     | 0.1     |
| Iron                          | mg/dl                | 70-175    | 101.8   | 129.0   | 119.7   |
| CK                            | IU/L                 | 60-350    | 291.6   | 257.0   | 277.4   |
| AST                           | IU/L                 | 15-45     | 27.2    | 24.3    | 30.3    |
| ALT                           | IU/L                 | 30-140    | 64.6    | 61.7    | 68.7    |
| ALP                           | IU/L                 | 10-80     | 27.2    | 19.0    | 19.0    |
| GGT                           | IU/L                 | 0.0-5.0   | 0.0     | 0.0     | 0.0     |
| Na <sup>+</sup>               | mEq/L                | 149-157   | 152.4   | 151.8   | 151.9   |
| K <sup>+</sup>                | mEq/L                | 3.7-5.4   | 4.5     | 4.4     | 4.5     |
| Cl <sup>-</sup>               | mEq/L                | 114-125   | 114.7   | 114.1   | 115.1   |
| HCO <sub>3</sub> <sup>-</sup> | mEq/L                | 13-22     | 18.1    | 18.3    | 18.4    |
| Anion Gap                     | mEq/L                | 16-26     | 24.2    | 24.0    | 22.7    |
| <b>HEMATOLOGY</b>             |                      |           |         |         |         |
| WBC                           | x10 <sup>3</sup> /ml | 4.0-14.0  | 8.6     | 8.1     | 7.5     |
| Hgb                           | G/dl                 | 9.8-15.5  | 13.4    | 12.9    | 13.0    |
| Hct                           | %                    | 32-47     | 41.3    | 39.8    | 40.8    |
| RBC                           | x10 <sup>6</sup> /ml | 6.5-10.0  | 10.2    | 10.1    | 9.8     |
| MCV                           | fl                   | 40-52     | 40.8    | 39.7    | 41.8    |
| MCHC                          | G/dl                 | 32-36     | 32.7    | 32.5    | 32.1    |
| Segs                          | x10 <sup>3</sup> /ml | 2.0-12.0  | 3.8     | 3.5     | 3.2     |
| Bands                         | x10 <sup>3</sup> /ml | 0-0.1     | 0       | 0       | 0       |
| Lymphs                        | x10 <sup>3</sup> /ml | 1.5-6.0   | 4.2     | 4.0     | 3.6     |
| Monos                         | x10 <sup>3</sup> /ml | 0-0.8     | 0.2     | 0.2     | 0.2     |
| Eos                           | x10 <sup>3</sup> /ml | 0-1.2     | 0.3     | 0.4     | 0.5     |
| Basos                         | x10 <sup>3</sup> /ml | 0-0.1     | 0.1     | 0.0     | 0.0     |
| Platelets                     | x10 <sup>3</sup> /ml | 200-500   | 240.9   | 255.2   | 315.2   |
